# Supplementary material for: Reduced expression of AtNUP62 nucleoporin gene affects auxin response in Arabidopsis
Source: PubMed Central journal article supplement (PMC4700657; doi:10.1186/s12870-015-0695-y), 2016-01-05
Supplement: 12870_2015_695_MOESM1_ESM.pdf [file 12870_2015_695_MOESM1_ESM.pdf]

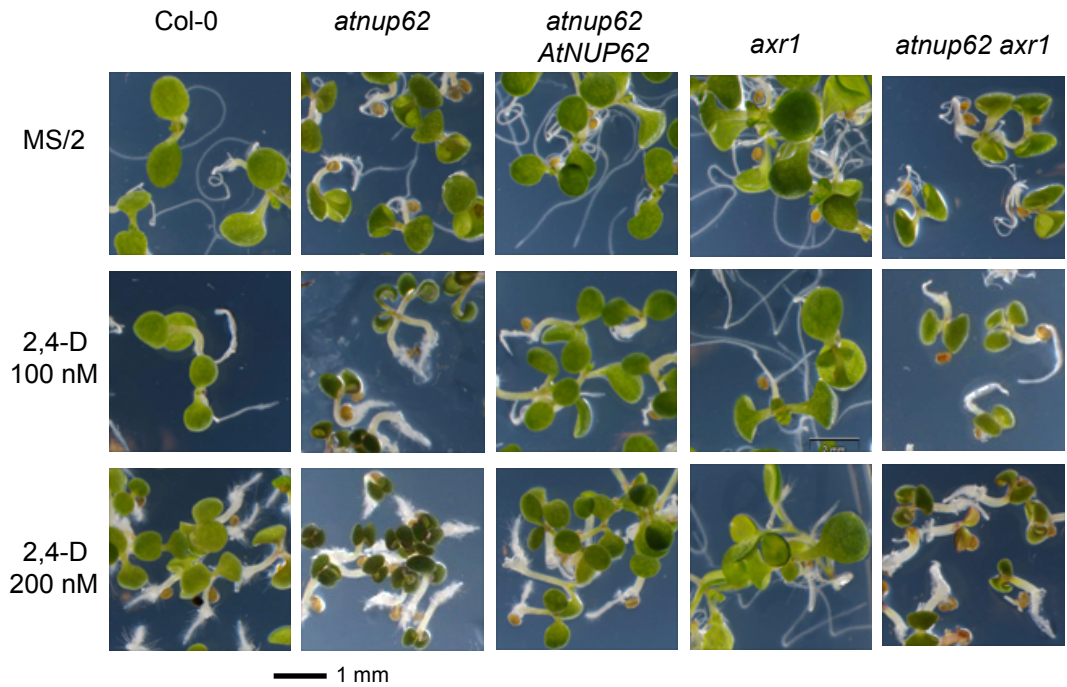

**Figure S1.** Auxin sensitivity of the *atnup62* and *atnup62 axr1* mutants (top views). Effect of 2,4-D on seedling growth, 6 day-old plantlets.
