# Supplementary material for: Reduced expression of AtNUP62 nucleoporin gene affects auxin response in Arabidopsis
Source: PubMed Central journal article supplement (PMC4700657; doi:10.1186/s12870-015-0695-y), 2016-01-05
Supplement: 12870_2015_695_MOESM2_ESM.pdf [file 12870_2015_695_MOESM2_ESM.pdf]

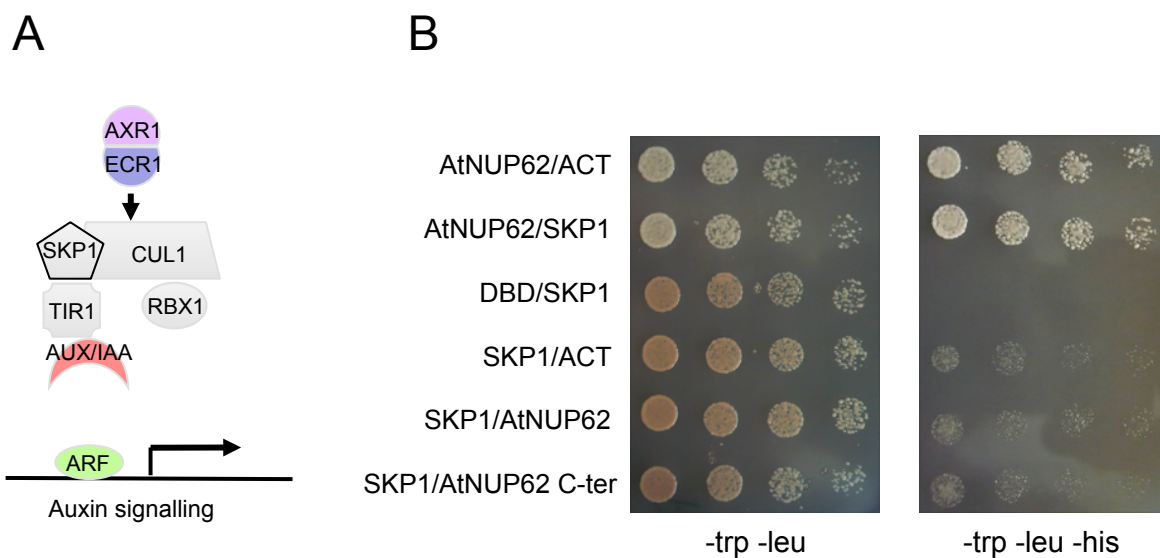

**Figure S2.** Absence of AtNUP62-SKP1 interaction in two-hybrid tests. **(a)** Classical model of transcriptional auxin signalling. **(b)** Two-hybrid tests (bait/prey) between AtNUP62 and SKP1. Left, growth of yeast transformants on medium that does not select for *HIS3* reporter gene activation. Right, growth on selective (minus histidine) medium. ACT: activator domain alone (empty prey vector), DBD: DNA-binding domain alone (bait vector), AtNUP62 C-ter: clone obtained from a screening of the cDNA library (encoding AtNUP62 protein from S266).
